# Supplementary material for: Surface modification of porous PLGA scaffolds with plasma for preventing dimensional shrinkage and promoting scaffold–cell/tissue interactions
Source: Royal Society of Chemistry journal article supplement (doi:10.1039/c8tb02374c), 2018-01-01
Supplement: c8tb02374c1.pdf [file c8tb02374c1.pdf]

## **Surface modification of porous PLGA scaffolds with plasma for preventing dimensional shrinkage and promoting scaffold-cell/tissue interactions**

*Peiming Liu,<sup>†</sup> Lian Sun,<sup>‡</sup> Pingying Liu,<sup>§,⊥</sup> Wenqian Yu,<sup>†</sup> Qianhui Zhang,<sup>†</sup> Weibing Zhang,<sup>‡</sup> Jing Ma,<sup>⊥</sup> Pingsheng Liu,<sup>\*†</sup> Jian Shen<sup>\*†,||</sup>*

<sup>†</sup>Jiangsu Collaborative Innovation Center of Biomedical Functional Materials, Jiangsu Key Laboratory of Bio-functional Materials, School of Chemistry and Materials Science, Nanjing Normal University, Nanjing 210023, P. R. China

<sup>‡</sup>Jiangsu Key Laboratory of Oral Diseases, Nanjing Medical University, Nanjing 210029, P. R. China

<sup>§</sup>School of Materials Science and Engineering, Jingdezhen Ceramic Institute, Jingdezhen 333403, P. R. China

<sup>⊥</sup>School of Chemistry and Chemical Engineering, Key Laboratory of Mesoscopic Chemistry of MOE, Nanjing University, Nanjing 210093, P. R. China

<sup>||</sup>Jiangsu Engineering Research Center of Interfacial Chemistry, Nanjing University, Nanjing 210093, P. R. China

\*Corresponding Authors :

E-mail: [liups@njnu.edu.cn](mailto:liups@njnu.edu.cn) (P. Liu); [jshen@njnu.edu.cn](mailto:jshen@njnu.edu.cn) (J. Shen)

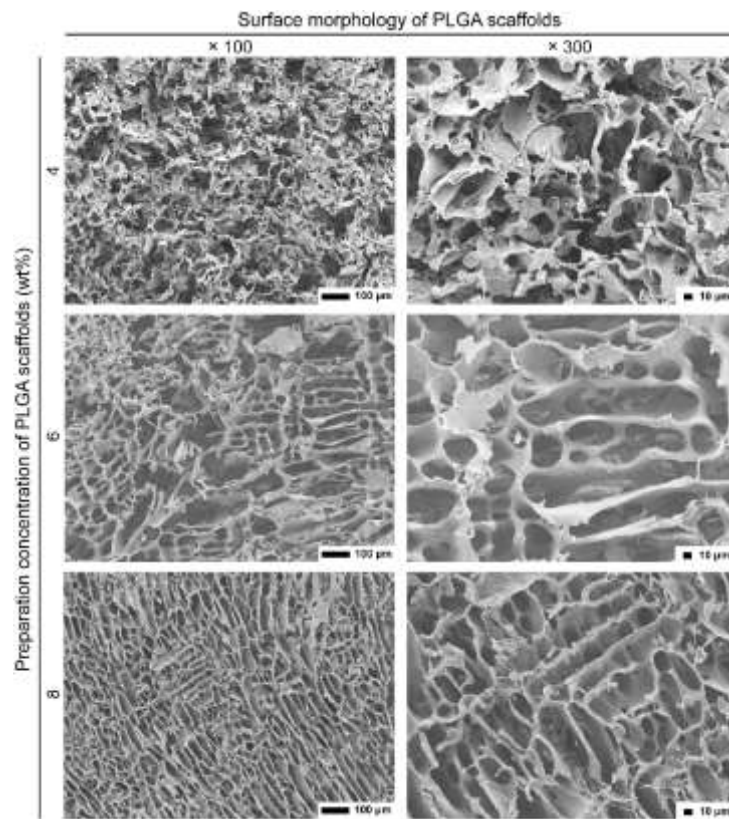

**Fig. S1** SEM micrographs on the surface of porous PLGA scaffolds prepared by various concentrations (4, 6, and 8 wt%).

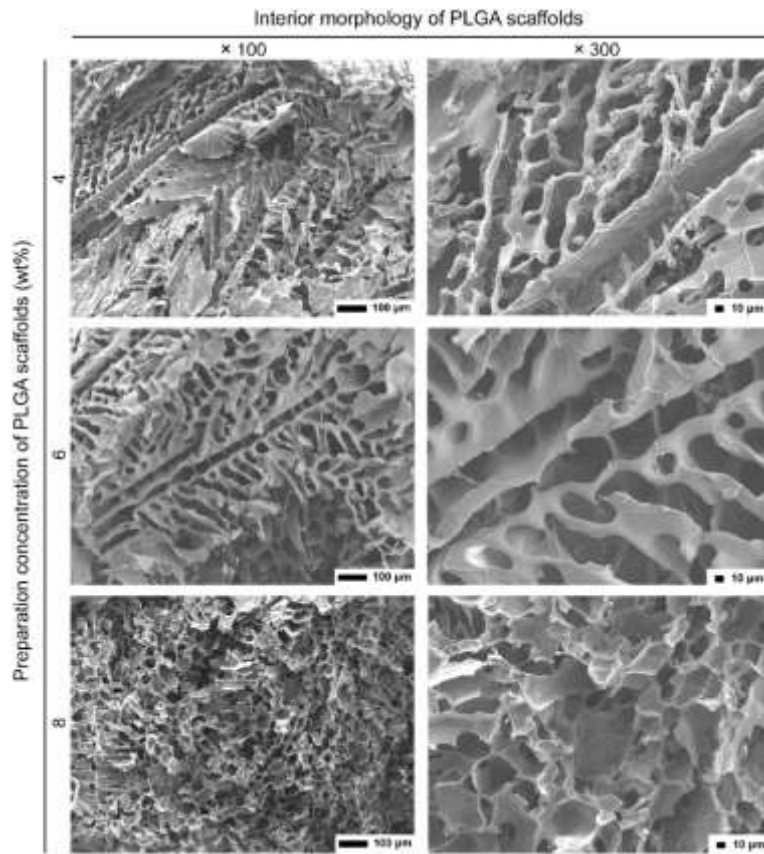

**Fig. S2** SEM micrographs in the cross-section of porous PLGA scaffolds prepared by various concentrations (4, 6, and 8 wt%).

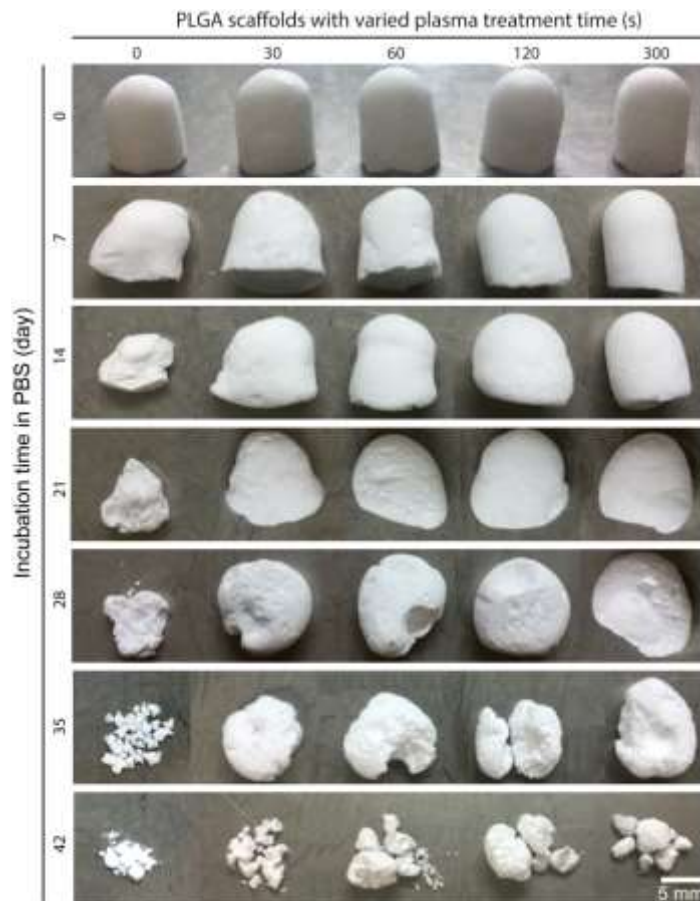

**Fig. S3** Overall morphology changes (side view) of porous PLGA scaffolds with varied plasma treatment time (ranging from 30 to 300 s) as a function of incubation time in PBS at 37°C.

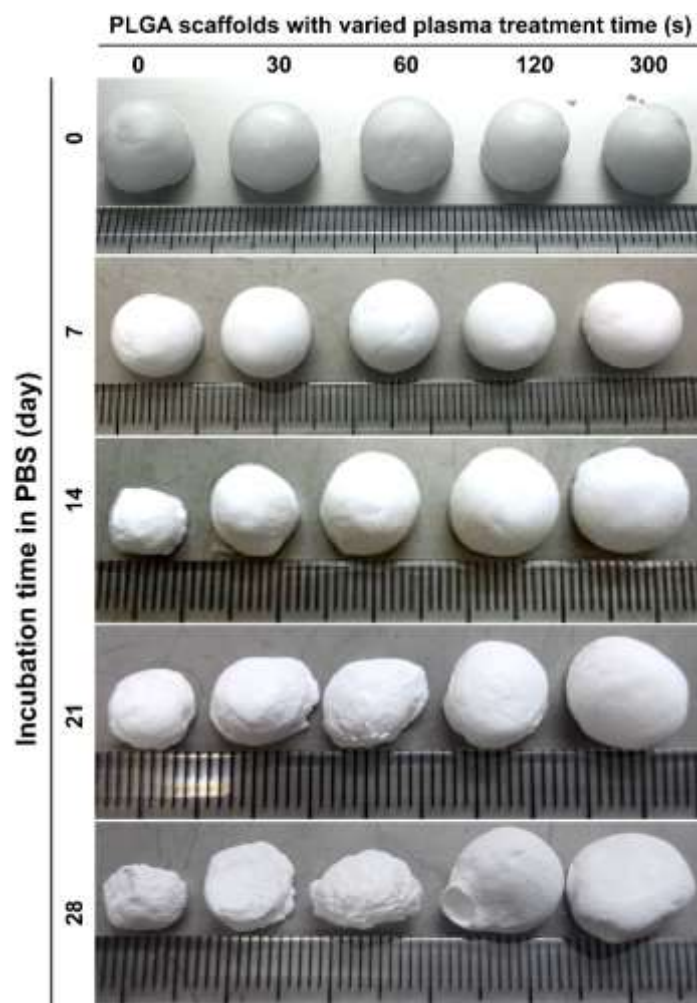

**Fig. S4** Overall morphology changes (top view) of porous PLGA scaffolds with varied plasma treatment time (ranging from 30 to 300 s) as a function of incubation time in PBS at 37°C.
